# Supplementary material for: Impaired haematopoietic stem cell differentiation and enhanced skewing towards myeloid progenitors in aged caspase-2-deficient mice
Source: PubMed Central journal article supplement (PMC5260989; doi:10.1038/cddis.2016.406), 2016-12-01

Supplementary Figure 1

**Aged WT**

**Aged *Casp2*<sup>-/-</sup>**

1

2

1

2

**a**

4X

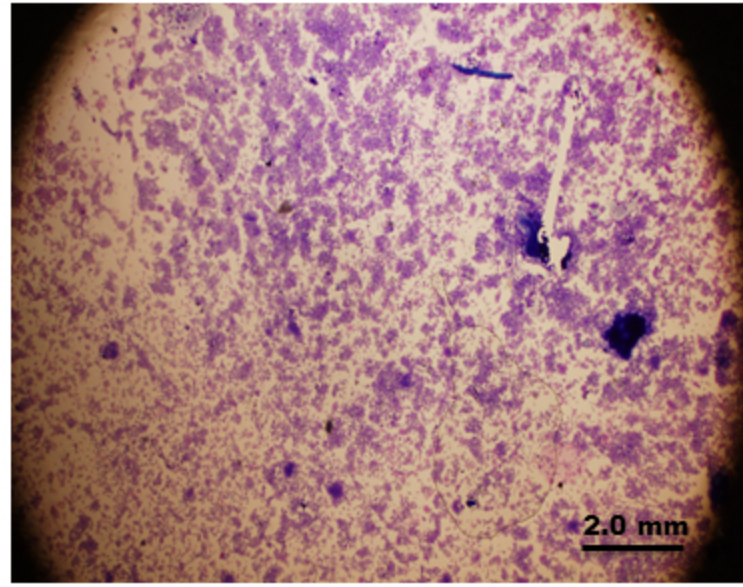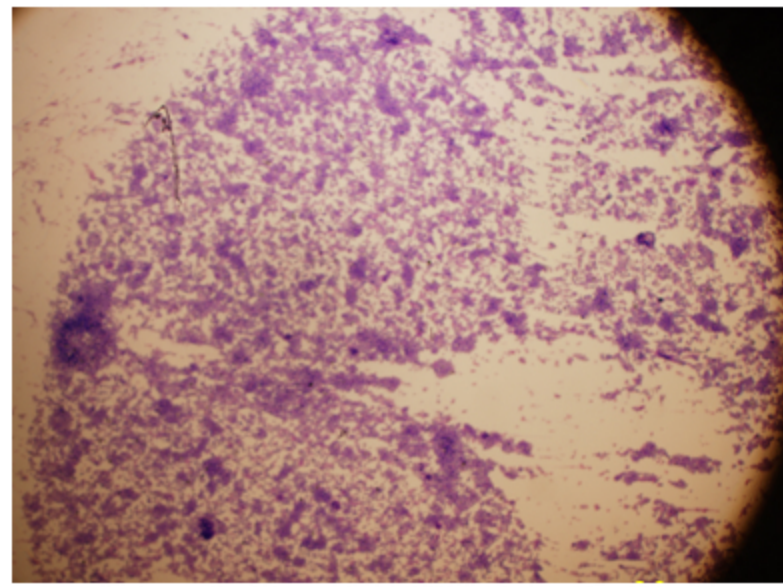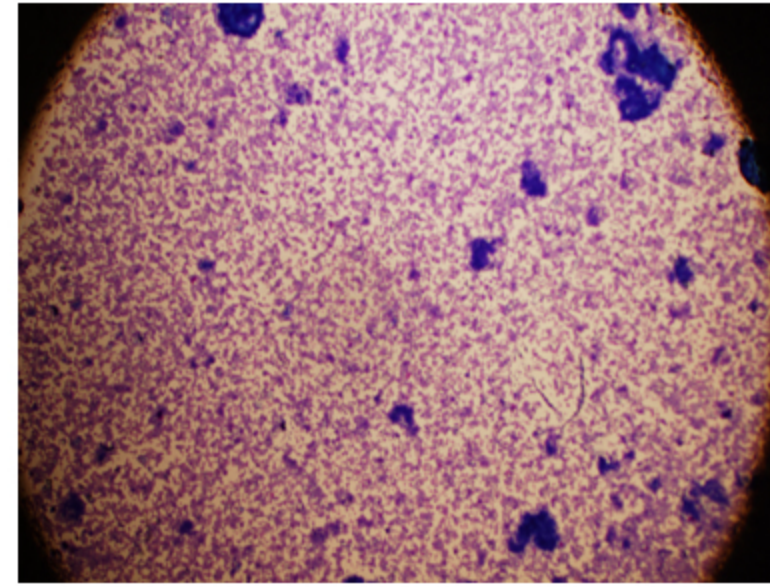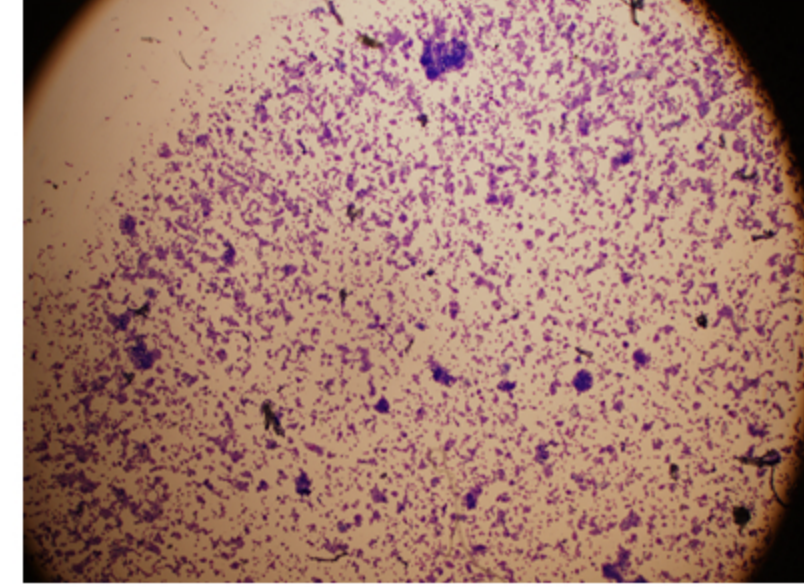

**b**

20X

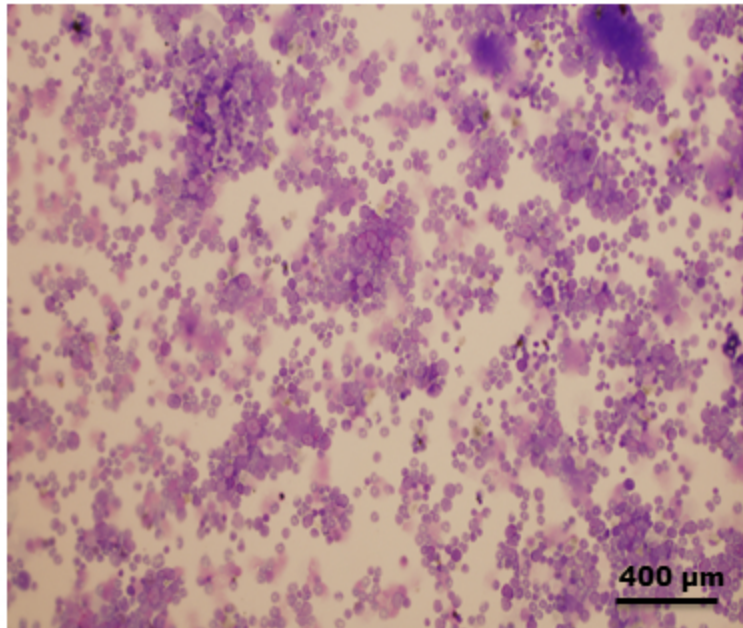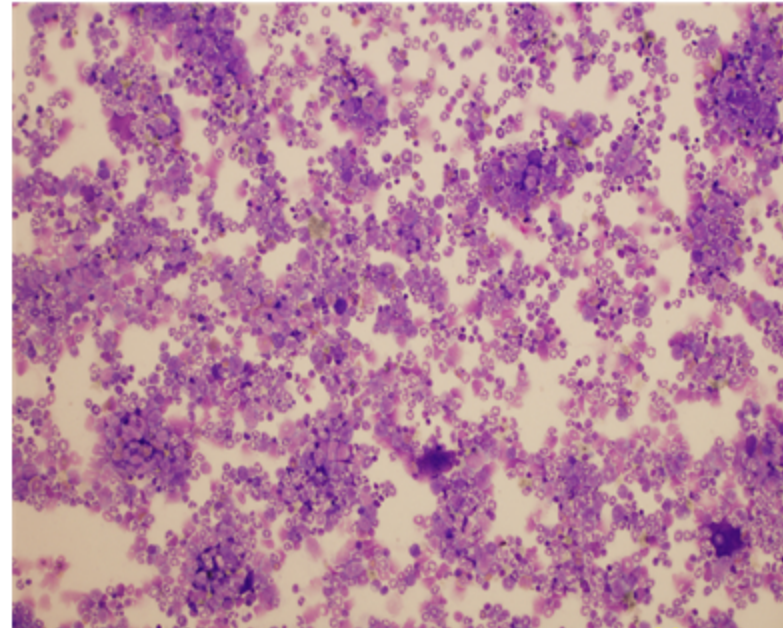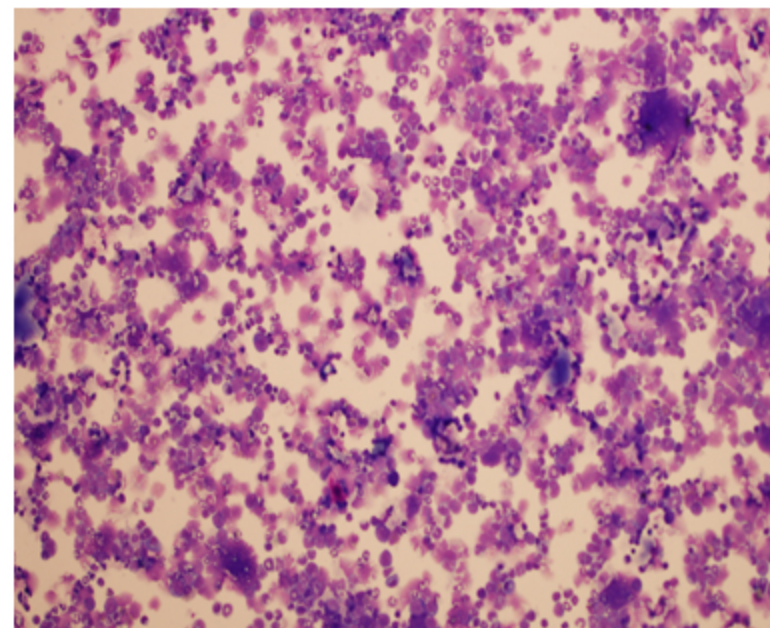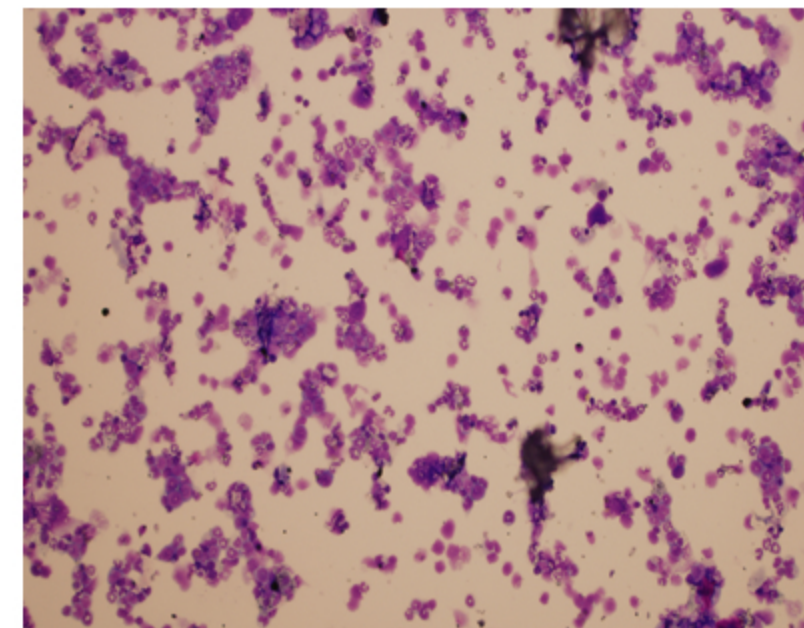

**c**

100X

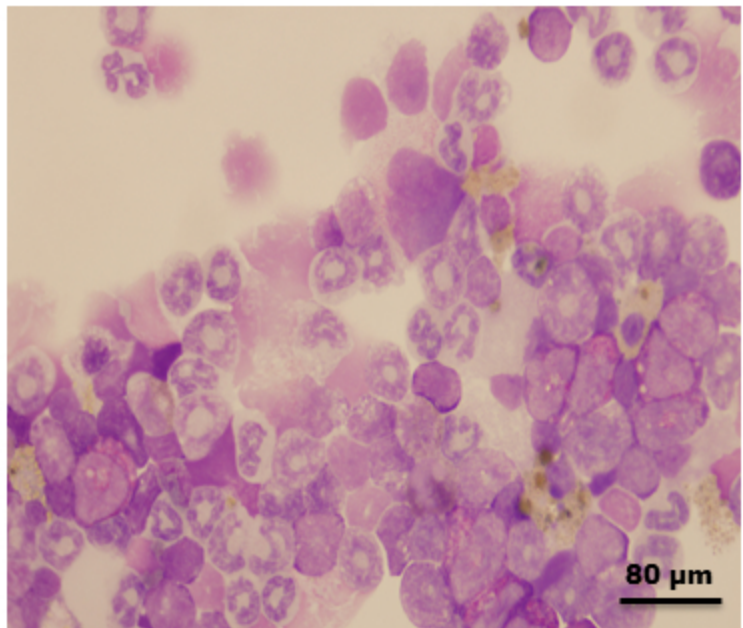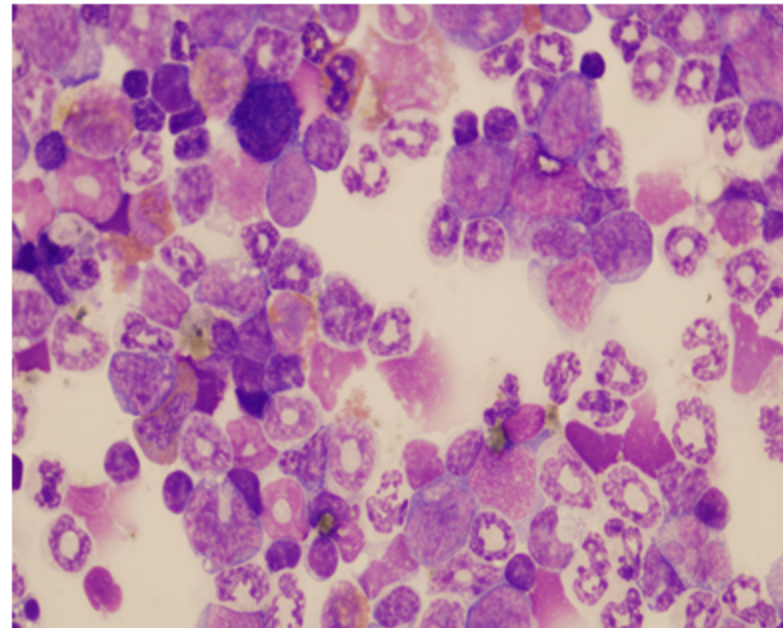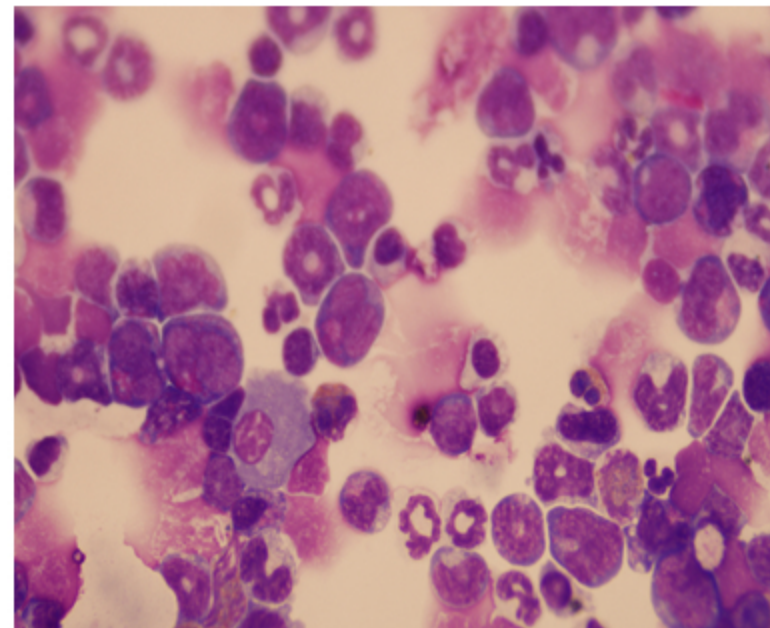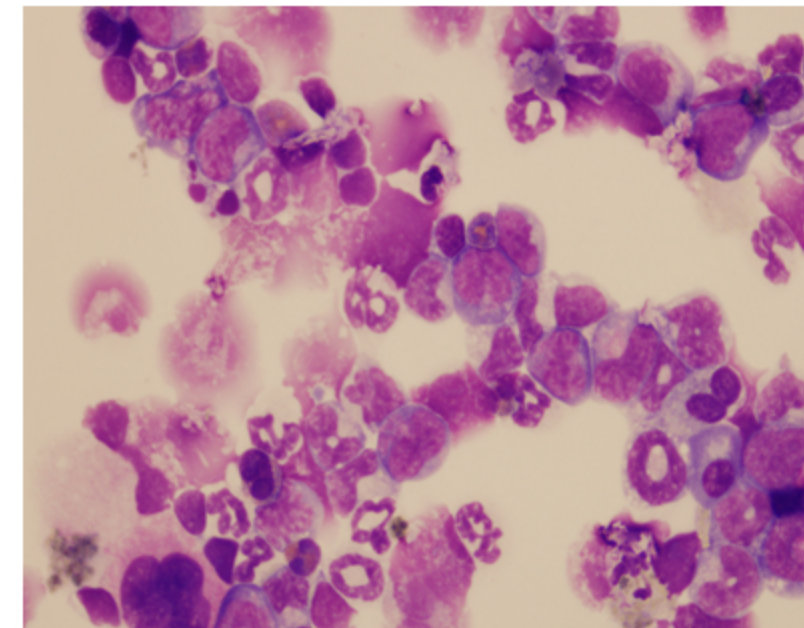

Supplement: cddis2016406x2.pdf [file cddis2016406x2.pdf]
