# Supplementary material for: Impaired haematopoietic stem cell differentiation and enhanced skewing towards myeloid progenitors in aged caspase-2-deficient mice
Source: PubMed Central journal article supplement (PMC5260989; doi:10.1038/cddis.2016.406), 2016-12-01

# Supplementary Figure S2

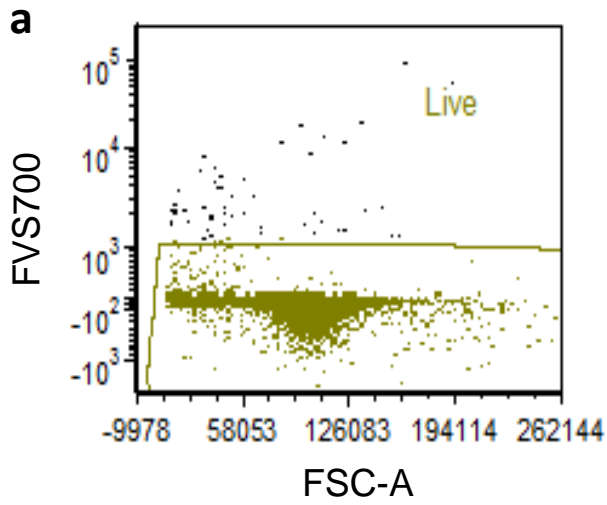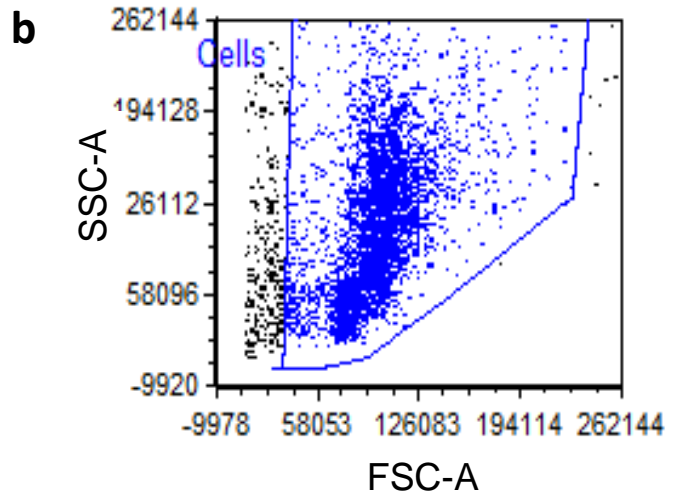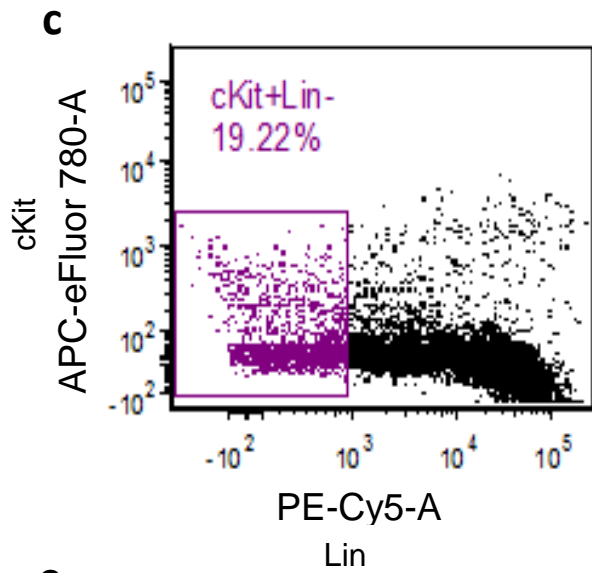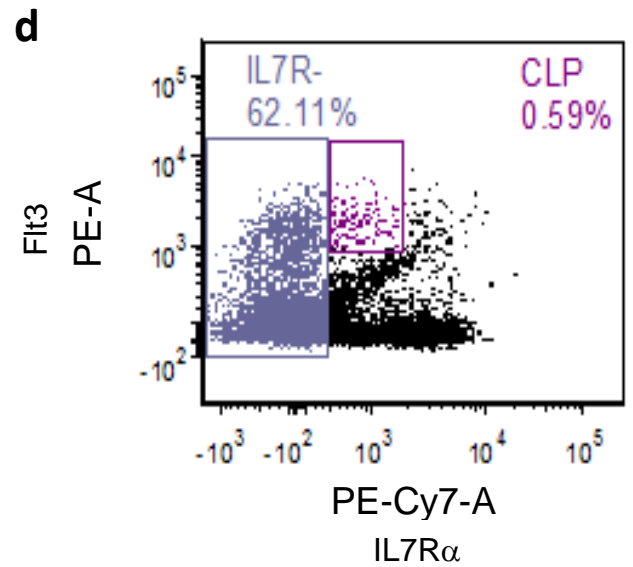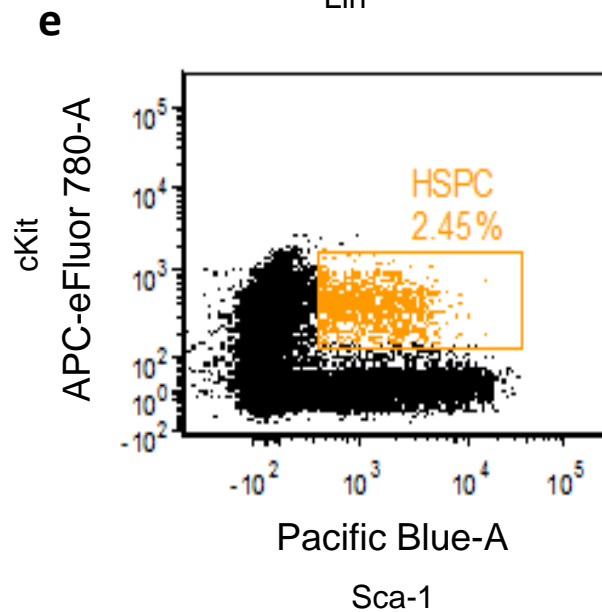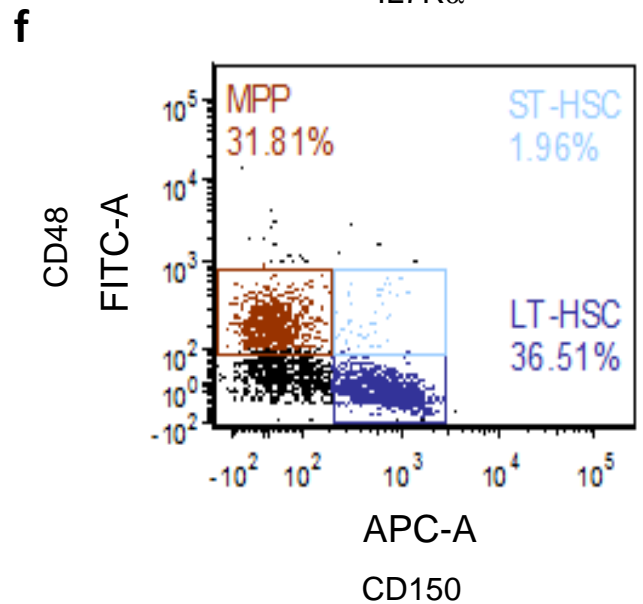

Supplement: cddis2016406x3.pdf [file cddis2016406x3.pdf]
